# Supplementary material for: Protective effect of butin against ischemia/reperfusion-induced myocardial injury in diabetic mice: involvement of the AMPK/GSK-3β/Nrf2 signaling pathway
Source: PubMed Central journal article supplement (PMC5269748; doi:10.1038/srep41491), 2017-01-27

**Protective effect of butin against ischemia/reperfusion-induced myocardial injury in diabetic mice: involvement of the AMPK/GSK-3 $\beta$ /Nrf2 signaling pathway**

**Jialin Duan<sup>a,b,1</sup>, Yue Guan<sup>a1</sup>, Fei Mu<sup>a1</sup>, Chao Guo<sup>a1</sup>, Enhu Zhang<sup>b1</sup>, Ying Yin<sup>a</sup>, Guo Wei<sup>a</sup>, Yanrong Zhu<sup>a</sup>, Jia Cui<sup>a</sup>, Jinyi Cao<sup>a</sup>, Yan Weng<sup>a</sup>, Yanhua Wang<sup>a</sup>, Miaomiao Xi<sup>a\*</sup>, Aidong Wen<sup>a\*</sup>**

<sup>a</sup>Department of Pharmacy, Xijing Hospital, Fourth Military Medical University, Xi'an, 710032, China.

<sup>b</sup>College of Pharmacy, Shaanxi University of Chinese Medicine, XianYang 712083, PR China

<sup>1</sup> These authors equally contributed to this work.

\*Corresponding authors. Prof. Wen and Prof. Xi both are contacted at Changle West Road 127, Xi'an, Shaanxi, China. Tel.: +86 29 8477 3636; Fax: +86 29 8477 3636.

***Email address:*** aidongwen2015@163.com (AD. Wen), miaomiaoxi2014@163.com (MM. Xi).

**Supplemental figures**

**Supplementary table 1: Effect of BUT on the levels of blood glucose.**

| Parameter                 | Control | Model                  | BUT(10)  | BUT(20)                | BUT(40)                | MET                    |
|---------------------------|---------|------------------------|----------|------------------------|------------------------|------------------------|
| <b>Blood glucose (mM)</b> | 7.7±2.4 | 22.4±3.2 <sup>##</sup> | 20.3±2.8 | 16.3±3.3 <sup>**</sup> | 13.6±3.1 <sup>**</sup> | 13.1±2.7 <sup>**</sup> |

Values (n=6–8 per group) are expressed as means ± SD. <sup>##</sup>P<0.01 vs control group, <sup>\*\*</sup>P<0.01 vs model group. Control group: normal mice; Model: diabetic mice; BUT(10), BUT(20), BUT(40): diabetic mice were treated with 10, 20 and 40 mg/kg BUT, respectively; MET: diabetic mice were treated with 50 mg/kg MET.

**Supplementary table 2: The relationship between the size of AAR and the size of Infarct was plotted and analyzed using analysis of covariance.**

Tests of Between-Subjects Effects

Dependent Variable: Infarct

| Source          | Type III Sum of Squares | df | Mean Square | F      | Sig. |
|-----------------|-------------------------|----|-------------|--------|------|
| Corrected Model | 2662.247 <sup>a</sup>   | 8  | 332.781     | 70.258 | .000 |
| Intercept       | .026                    | 1  | .026        | .005   | .942 |
| AAR             | 13.605                  | 1  | 13.605      | 2.872  | .111 |
| GROUP           | 1253.281                | 7  | 179.040     | 37.800 | .000 |
| Error           | 71.048                  | 15 | 4.737       |        |      |
| Total           | 6031.069                | 24 |             |        |      |
| Corrected Total | 2733.295                | 23 |             |        |      |

a. R Squared = .974 (Adjusted R Squared = .960)

**Supplementary figure 1:** (A) Plasma creatine kinase-MB (CK-MB) and (B) lactate dehydrogenase (LDH) levels. Values (n=6–8 per group) are expressed as means  $\pm$  SD.  $^{##}P<0.01$  vs DM+sham group,  $^{**}P<0.01$  vs DM+I/R group,  $^{\&}P<0.05$  vs I/R group.

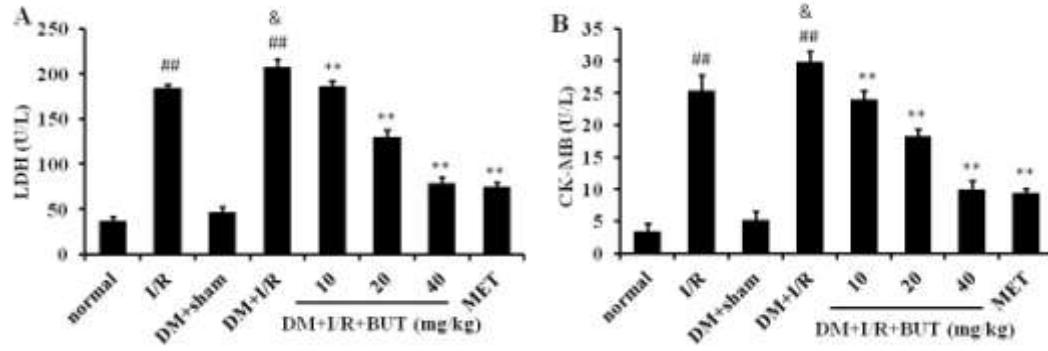

**Supplemental figure 2:** BUT up-regulated the expression of GSH-Px, GSH, CAT, GR in the heart. Mice received I/R treatment in the presence or absence of BUT pre-treatment, the expression level of GSH-Px (A), GSH (B), CAT (C) and GR (D) in the heart were measured as described in Materials and methods. Values (n=6–8 per group) are expressed as means  $\pm$  SD.  $^{##}P<0.01$  vs DM+sham group,  $^{**}P<0.01$  vs DM+I/R group.

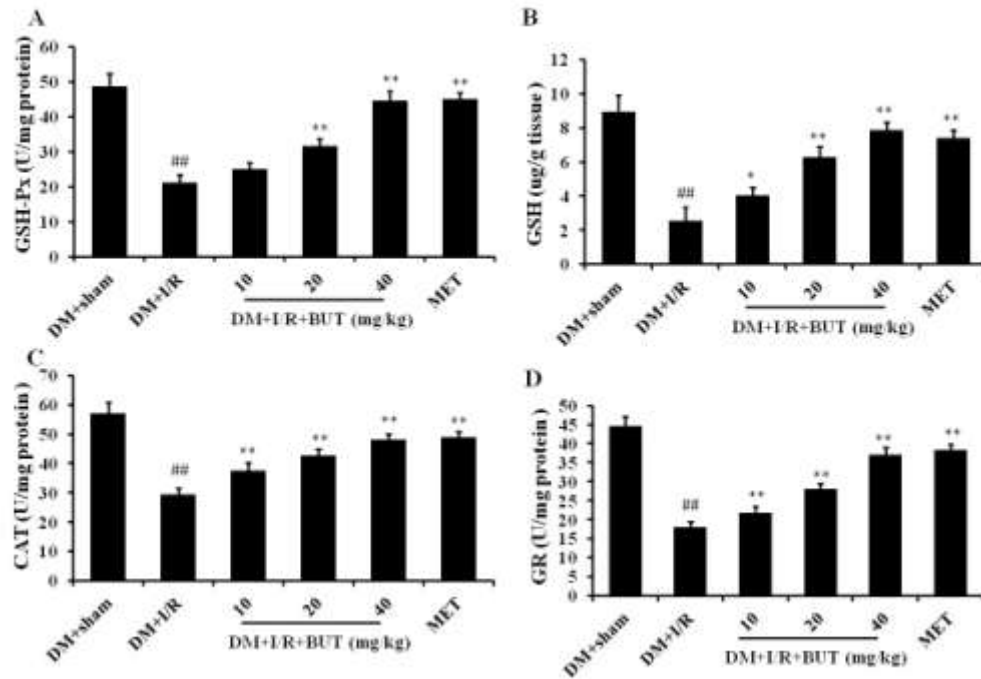

**Supplemental figure 3:** Effects of BUT on AMPK, Akt and GSK3 $\beta$  phosphorylation and Nrf2 expression in heart treated with I/R. Immunoblotting of protein extracts from heart of mice treated with BUT (40 mg/kg). Levels of Nrf2 expression and AMPK, Akt, GSK3 $\beta$  phosphorylation in the hearts of mice treated with BUT. The columns and errors bars represent means  $\pm$ SD. <sup>###</sup> $P$ <0.01 vs sham group, <sup>\*\*</sup> $P$ <0.01 vs I/R group.

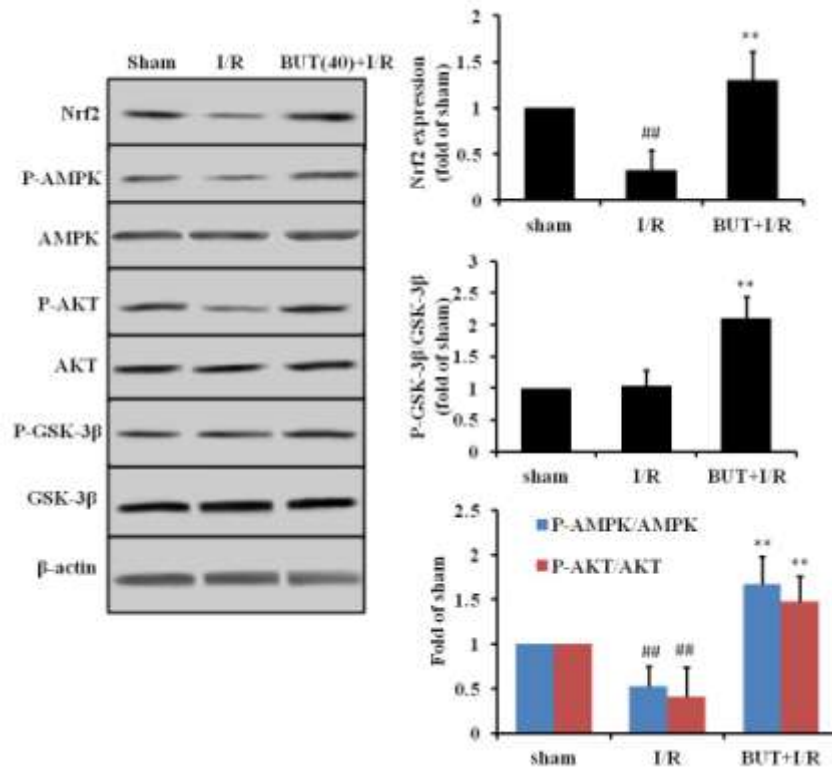

**Supplemental figure 4:** BUT induced the cytoplasm expression and nuclear translocation of Nrf2 determined by immunofluorescence staining. Left panel: green fluorescence showing Nrf2 localization; Middle panel: stained nucleus with DAPI.

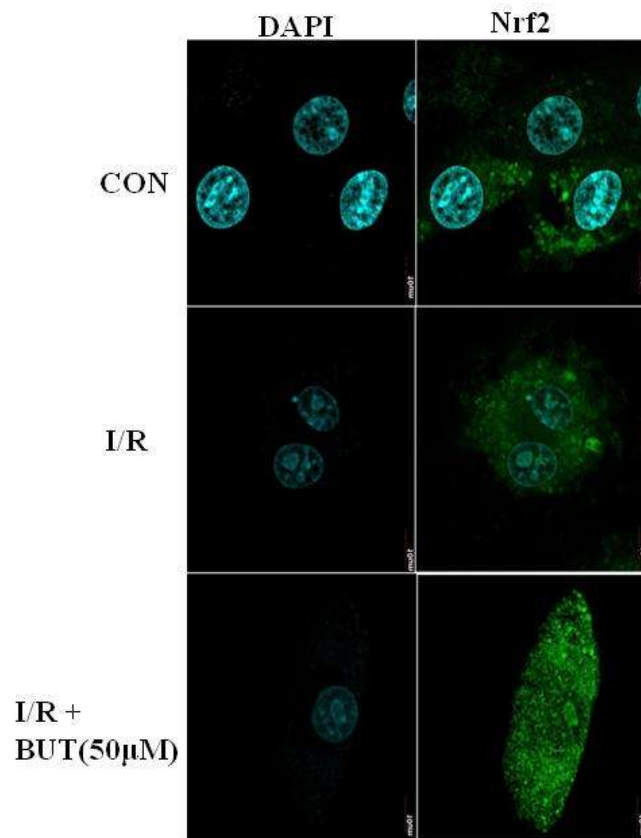

**Supplemental figure 5:** Cell viability (A) and Ros levels (B) were determined after siRNA transfection. The columns and errors bars represent means  $\pm$ SD. \*\* $P < 0.01$  vs I/R group. ## $P < 0.01$  vs control group. && $P < 0.01$  and \$\$ $P < 0.01$  vs scrambled control RNA.

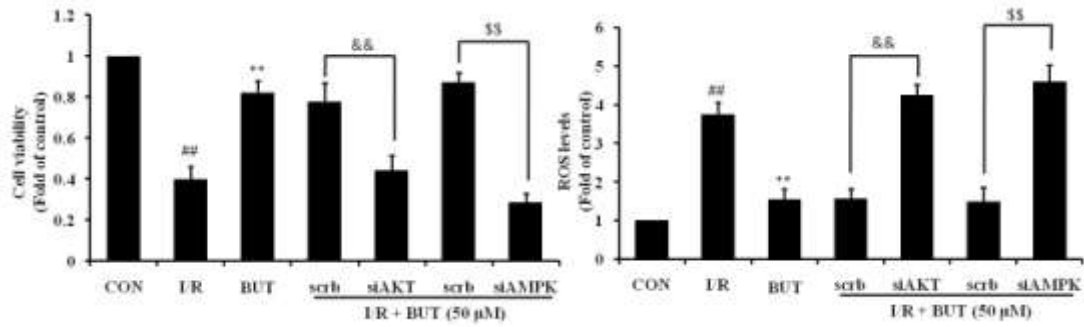

Supplement: srep41491-s1.pdf [file srep41491-s1.pdf]
